# Supplementary material for: Eosinophil-mediated lung inflammation associated with elevated natural killer T cell response in COVID-19 patients
Source: PubMed Central journal article supplement — Korean J Intern Med. 2021 Sep 27;37(1):201–9. doi: 10.3904/kjim.2021.093 (PMC8747909; doi:10.3904/kjim.2021.093), 2021-09-27
Supplement: kjim-2021-093-suppl2.pdf [file kjim-2021-093-suppl2.pdf]

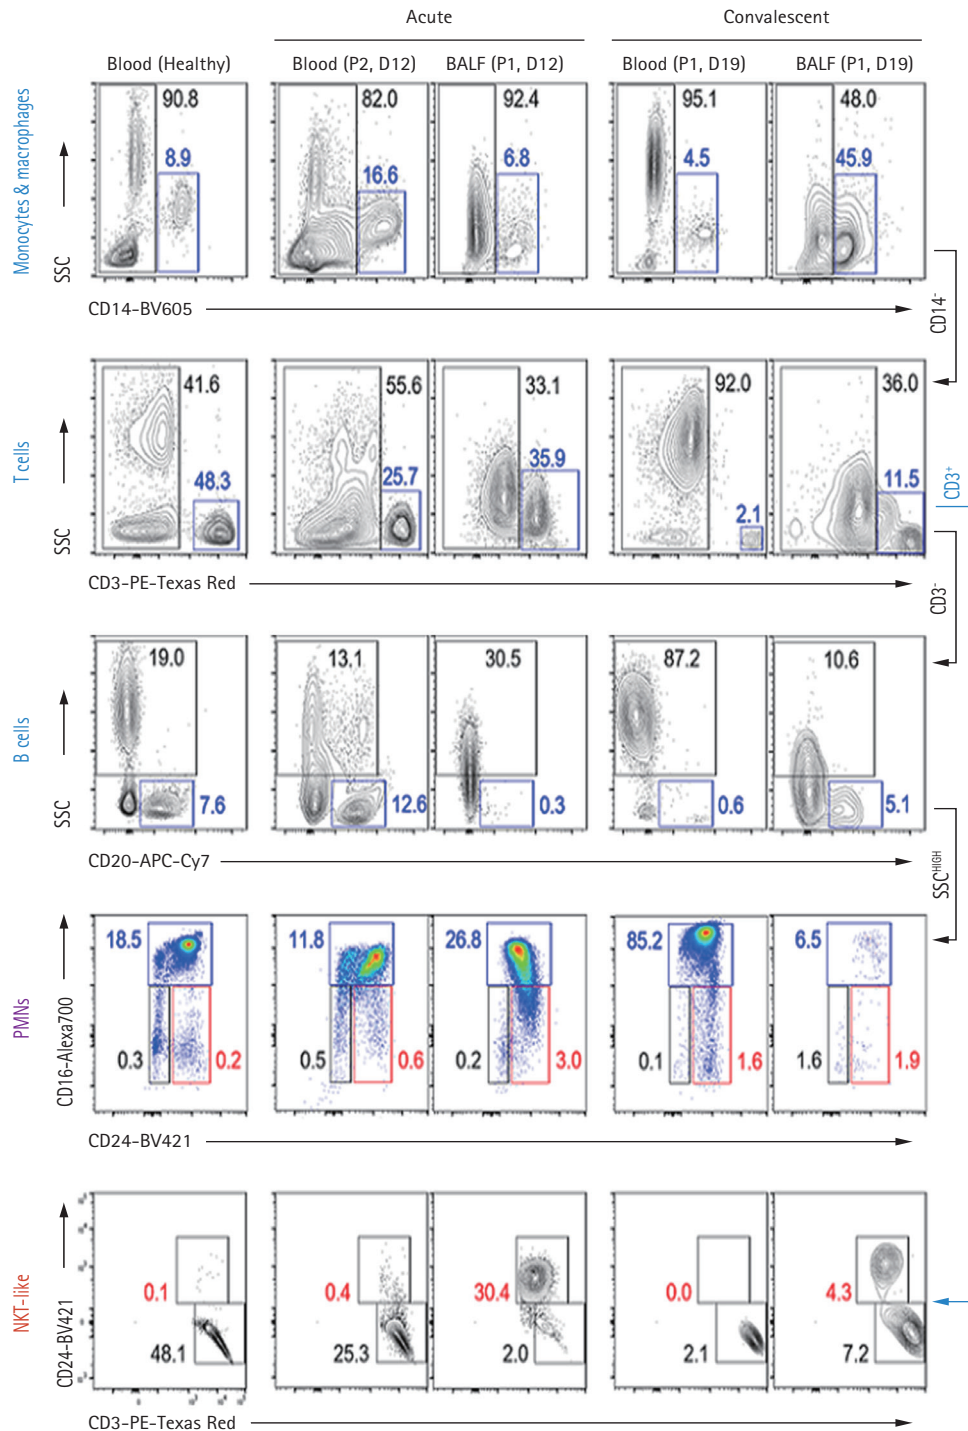

**Supplementary Figure 1.** Relative frequencies of leukocyte subtypes in blood and bronchoalveolar lavage fluid (BALF) specimens from patients with severe coronavirus disease 2019 (COVID-19). Flow cytometric analyses of leukocytes in blood and BALF specimens collected from two patients with severe COVID-19 (P1 and P2) during acute and convalescent phases were performed after staining with indicated antibodies. The patients' ID and sample collection day (days after symptom onset) are indicated at the top. Blood leukocytes collected from a healthy volunteer were used as a control for flow cytometry (left panels). The relative frequencies of specific leukocyte subtype population are indicated in each window. In polymorphonuclear (PMN) population, the relative frequencies of neutrophils (blue), eosinophils (red), and mast cells (black) are color-gated based on the expression levels of CD16 and CD24. All frequencies are relative levels of CD45<sup>+</sup> leukocytes. SSC, side scatter; PE, phycoerythrin; APC, allophycocyanin; NKT, natural killer T.
