# Supplementary material for: Eosinophil-mediated lung inflammation associated with elevated natural killer T cell response in COVID-19 patients
Source: PubMed Central journal article supplement — Korean J Intern Med. 2021 Sep 27;37(1):201–9. doi: 10.3904/kjim.2021.093 (PMC8747909; doi:10.3904/kjim.2021.093), 2021-09-27
Supplement: kjim-2021-093-suppl3.pdf [file kjim-2021-093-suppl3.pdf]

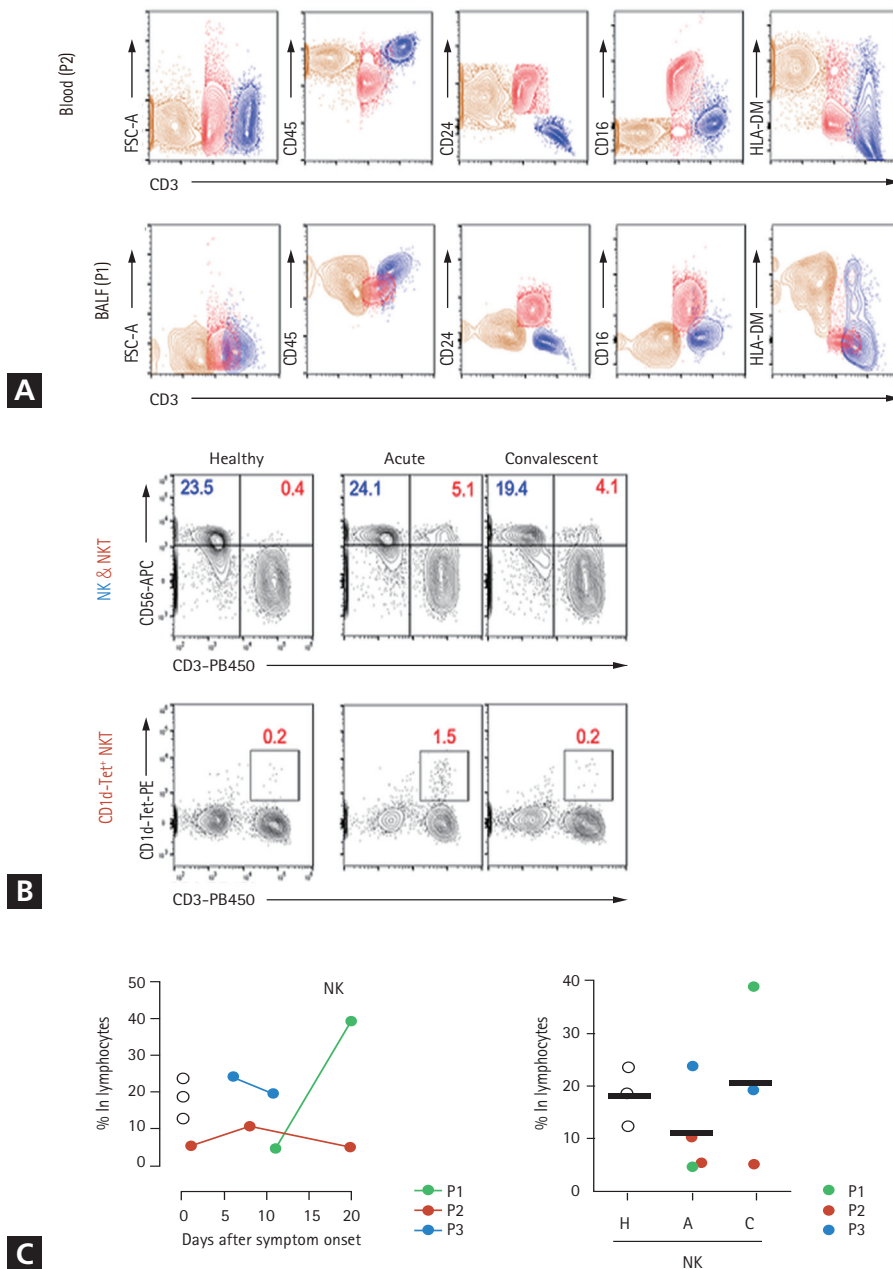

**Supplementary Figure 2.** Characterization of natural killer (NK) and natural killer T (NKT) cells in blood and bronchoalveolar lavage fluids (BALFs) and peripheral blood mononuclear cells (PBMCs) from patients with coronavirus disease 2019 (COVID-19). (A) Relative levels of leukocyte makers of B (brown), NKT-like (red), and T cells (blue) in blood and BALF specimens from patients with severe COVID-19. These cell types are gated population from Supplementary Fig. 1. (B) Representative contour plots identifying NK, NKT, and CD1d-tetramer (Tet)-positive NKT (invariant NKT) cells using PBMCs from the patients with COVID-19. (C) Kinetic changes in the relative frequencies of CD3-/CD56+ NK cells among lymphocytes from the indicated patients are presented (right panel). The relative frequencies of CD3-/CD56+ NK cells among lymphocytes from three healthy volunteers were included as controls (open circles). The relative frequencies of NK cells from three healthy volunteers were included as controls (H, open circles). Black bars indicate mean values. FSC-A, forward scatter-A; HLA-DM, human leukocyte antigen DM; APC, allophycocyanin; PE, phycoerythrin.
