# Supplementary material for: Eosinophil-mediated lung inflammation associated with elevated natural killer T cell response in COVID-19 patients
Source: PubMed Central journal article supplement — Korean J Intern Med. 2021 Sep 27;37(1):201–9. doi: 10.3904/kjim.2021.093 (PMC8747909; doi:10.3904/kjim.2021.093), 2021-09-27
Supplement: kjim-2021-093-suppl4.pdf [file kjim-2021-093-suppl4.pdf]

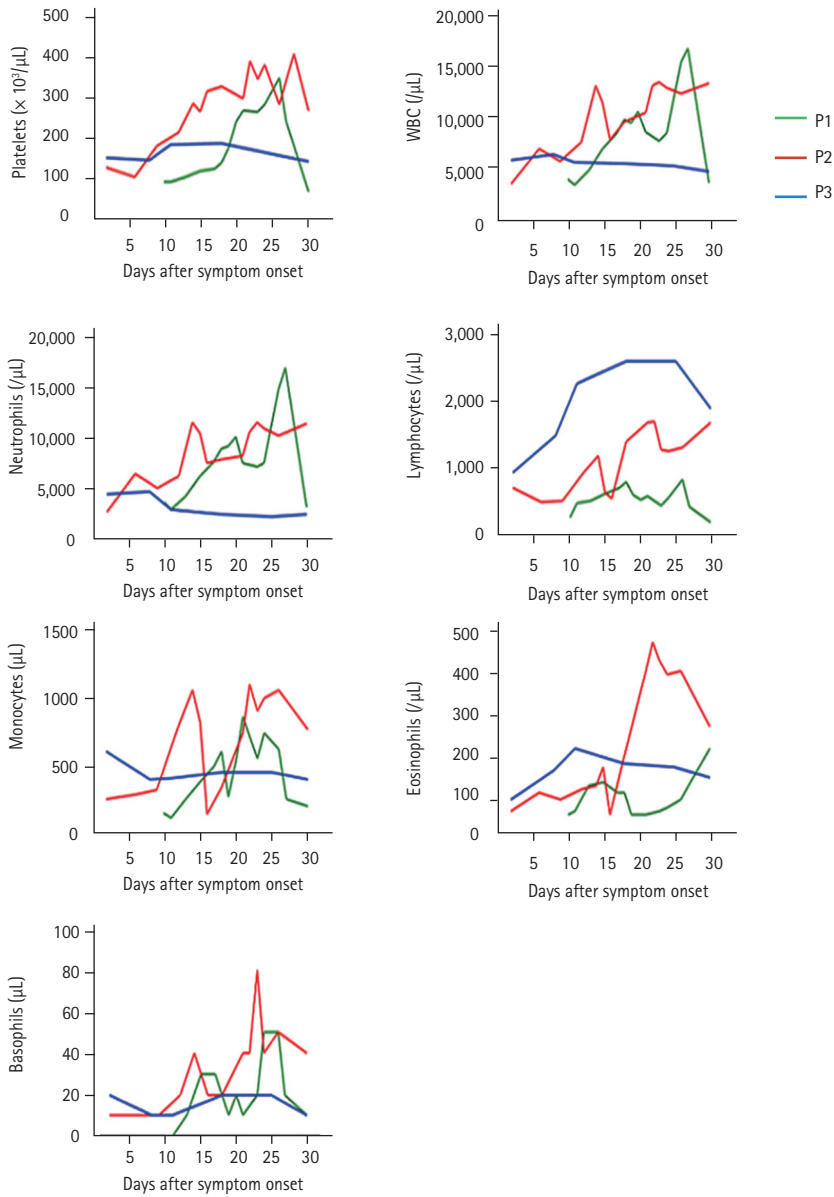

**Supplementary Figure 3.** Kinetics of complete blood counts for the three patients with coronavirus disease 2019 (COVID-19). WBC, white blood cell.
